# Supplementary material for: Direct chemical lithography writing on 2D materials by electron beam induced chemical reactions
Source: Royal Society of Chemistry journal article supplement (doi:10.1039/d5na00036j), 2025-01-01
Supplement: d5na00036j1.pdf [file d5na00036j1.pdf]

1 **Direct Chemical Lithography Writing on 2D Materials by Electron Beam Induced Chemical Reactions**

2

3 Iryna Danylo,<sup>1</sup> Lukáš Koláčný,<sup>1</sup> Kristína Kissíková,<sup>1</sup> Tomáš Hartman,<sup>2</sup> Alena Michalcová,<sup>3</sup> Martina Pitínová,<sup>1</sup>

4 Jiří Šturala,<sup>2</sup> Zdeněk Sofer\*<sup>2</sup> and Martin Veselý\*<sup>1</sup>

5

6

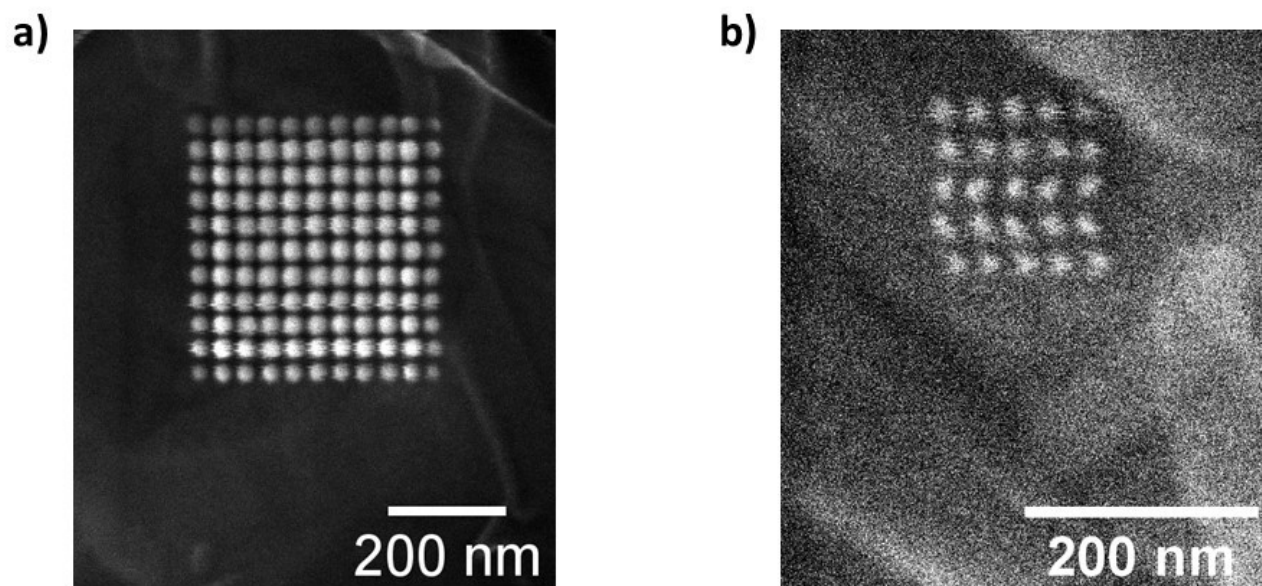

7

8 **Fig. S1** SEM images of deposited Pt NPs on TOGO sheet by EBL. Deposition time: (a) 0.03 s; (b) 0.01 s.

9 Distance between NPs: (a) 40 nm; (b) 30 nm

10 SEM images clearly confirmed the possibility for EBL to unambiguously distinguish Pt NPs with spatial  
11 distributions of up to 30 nm. According to Fig. S1a, the regular square lattice pattern of individual NPs can be  
12 nicely seen for the deposition time of 0.03 s and spatial distance between NPs of 40 nm. Furthermore,  
13 decreasing of deposition time up to 0.01 s allowed to deposit NPs with spatial distribution of 30 nm (Fig. S1b).  
14 However, the contrast between NPs and support became almost negligible for SEM to distinguish NPs, while  
15 EBL itself is able to deposit NPs at distance up to 10 nm.

16

<sup>1</sup> Department of Organic Technology, University of Chemistry and Technology, Prague, Czech Republic

<sup>2</sup> Department of Inorganic Chemistry, University of Chemistry and Technology, Prague, Czech Republic

<sup>3</sup> Department of Metals and Corrosion Engineering, University of Chemistry and Technology, Prague, Czech Republic

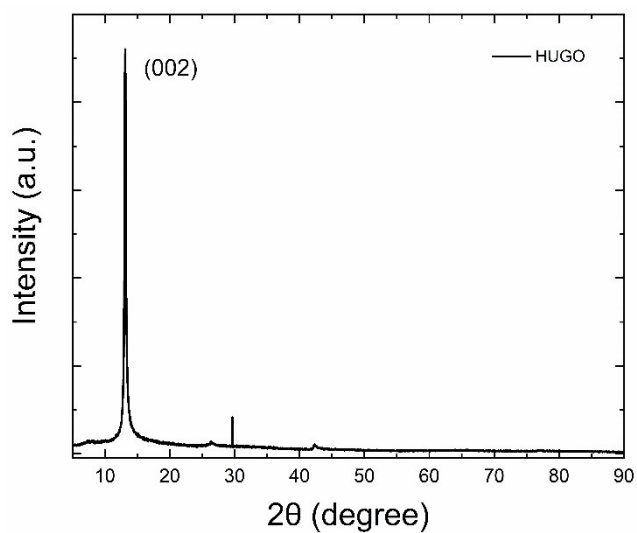

17

18 **Fig. S2** XRD spectrum of HUGO support

19

20

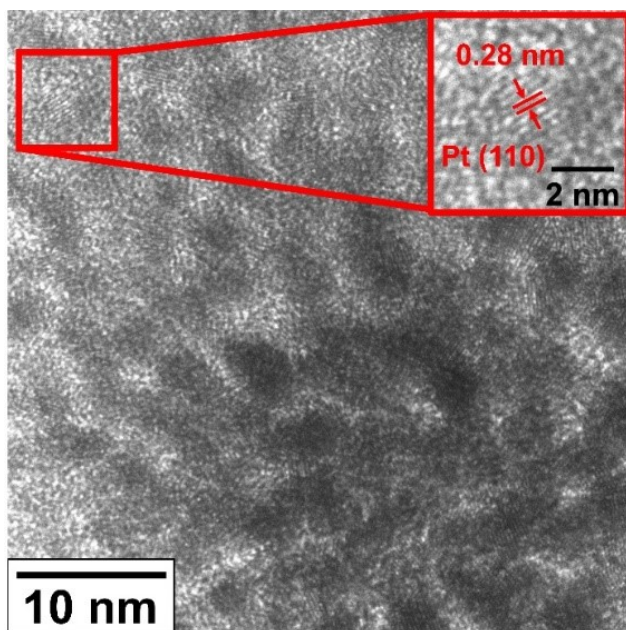

21

22 **Fig. S3** HR-TEM image of Pt/TOGO NPs used for FFT pattern calculation with focus on Pt lattice structure

23 corresponding to Pt [110]

24

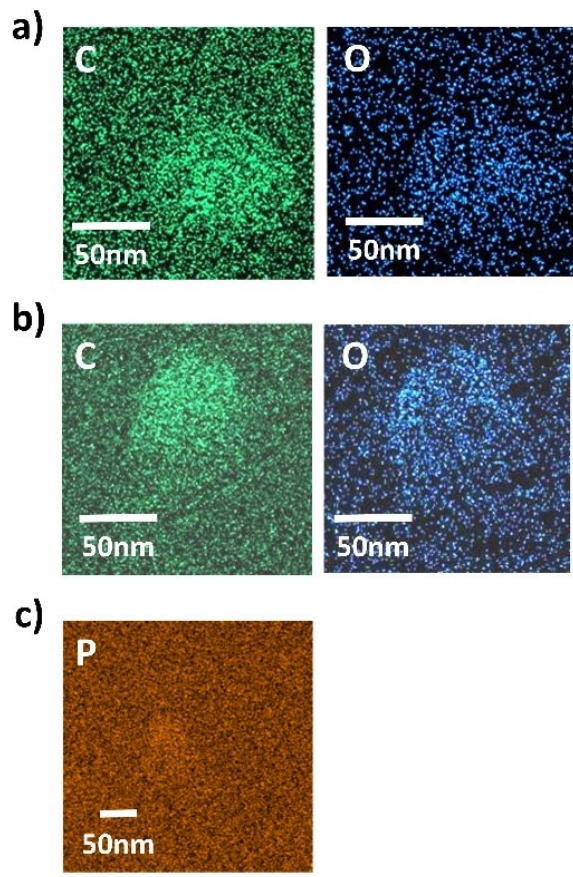

25  
26 **Fig. S4** EDS elemental mapping images of C, O and P from deposited Pt NPs: (a) TOGO sheet; (b) HUGO  
27 sheet; (c) BP sheet

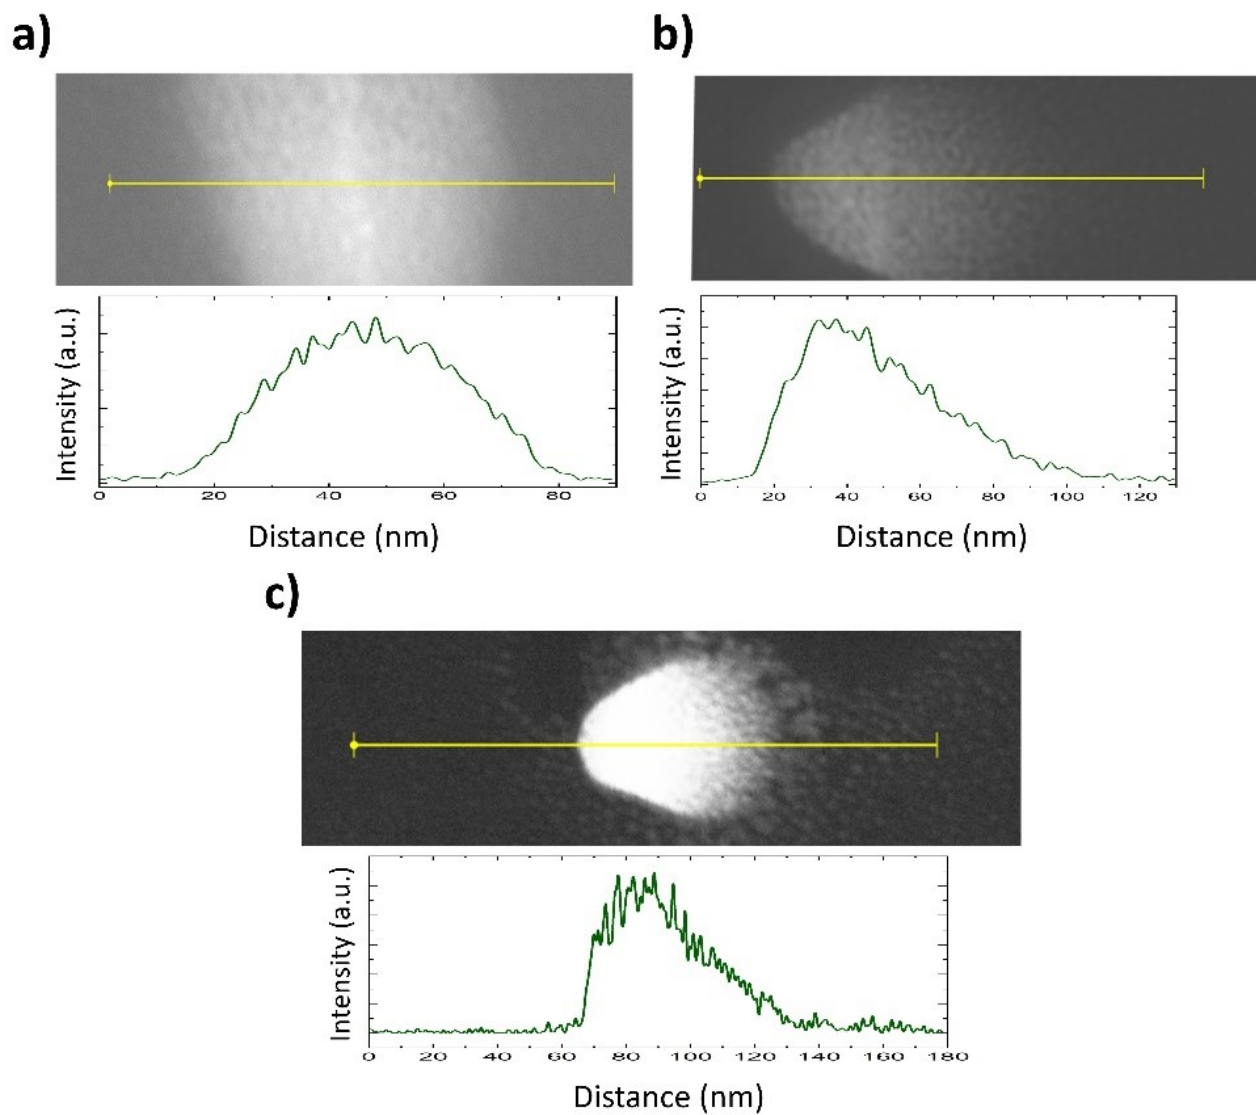

28  
29 **Fig. S5** Profile of deposited Pt NPs: (a) TOGO; (b) HUGO; (c) BP

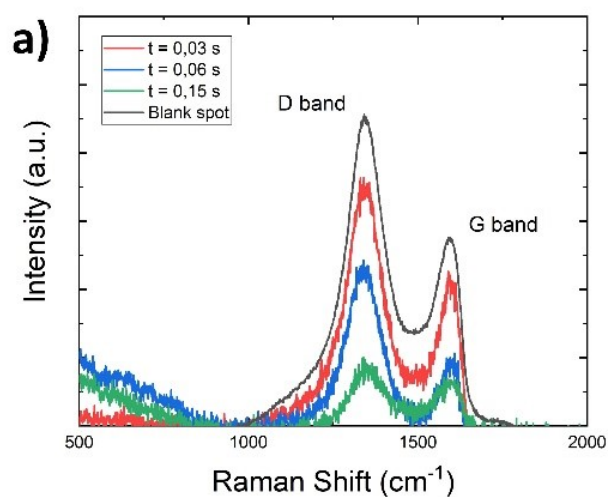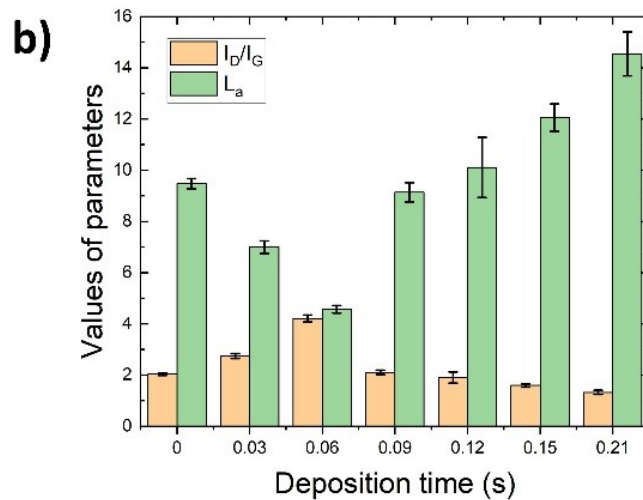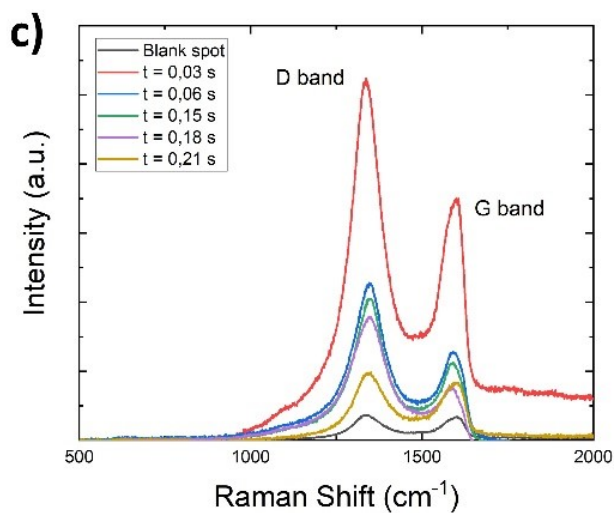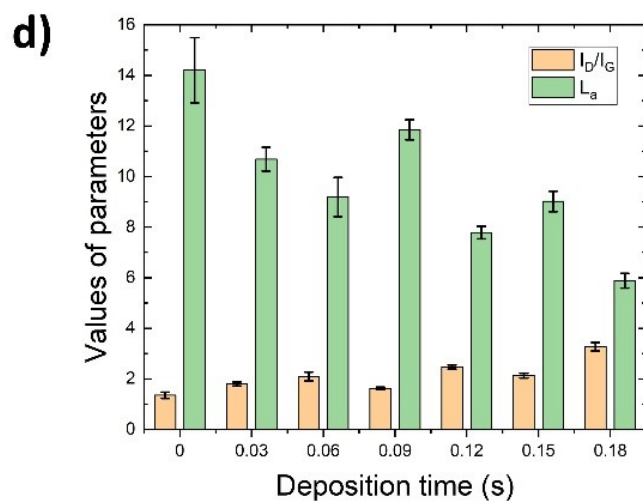

30

31 **Fig. S6** Raman spectra of deposited Pt NPs: (a) TOGO; (c) HUGO. Computed values of  $I_D/I_G$  ratio intensity

32 and crystallite size  $L_a$  for Raman spectra of deposited Pt NPs: (b) TOGO; (d) HUGO

33

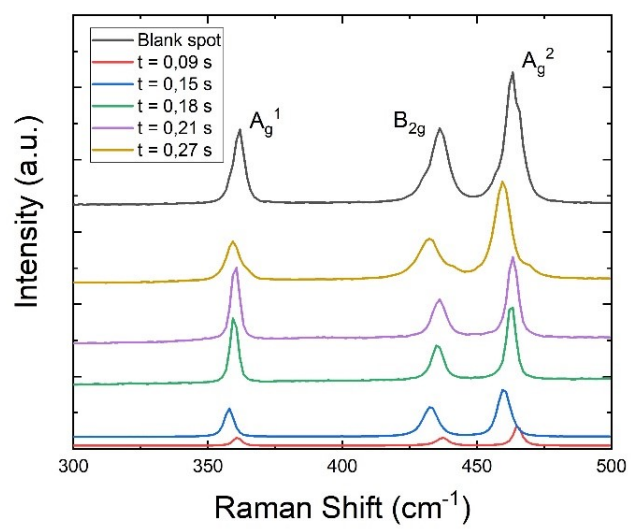

34

35 **Fig. S7** Raman spectra of deposited Pt NPs on BP
